# Supplementary material
Source: Springer Nature journal article supplement (https://www.springermedizin.de/resource/supplementary/12947_2011_433_MOESM5_ESM.pdf/9555734)

**Relaxation (% of Maximum)**

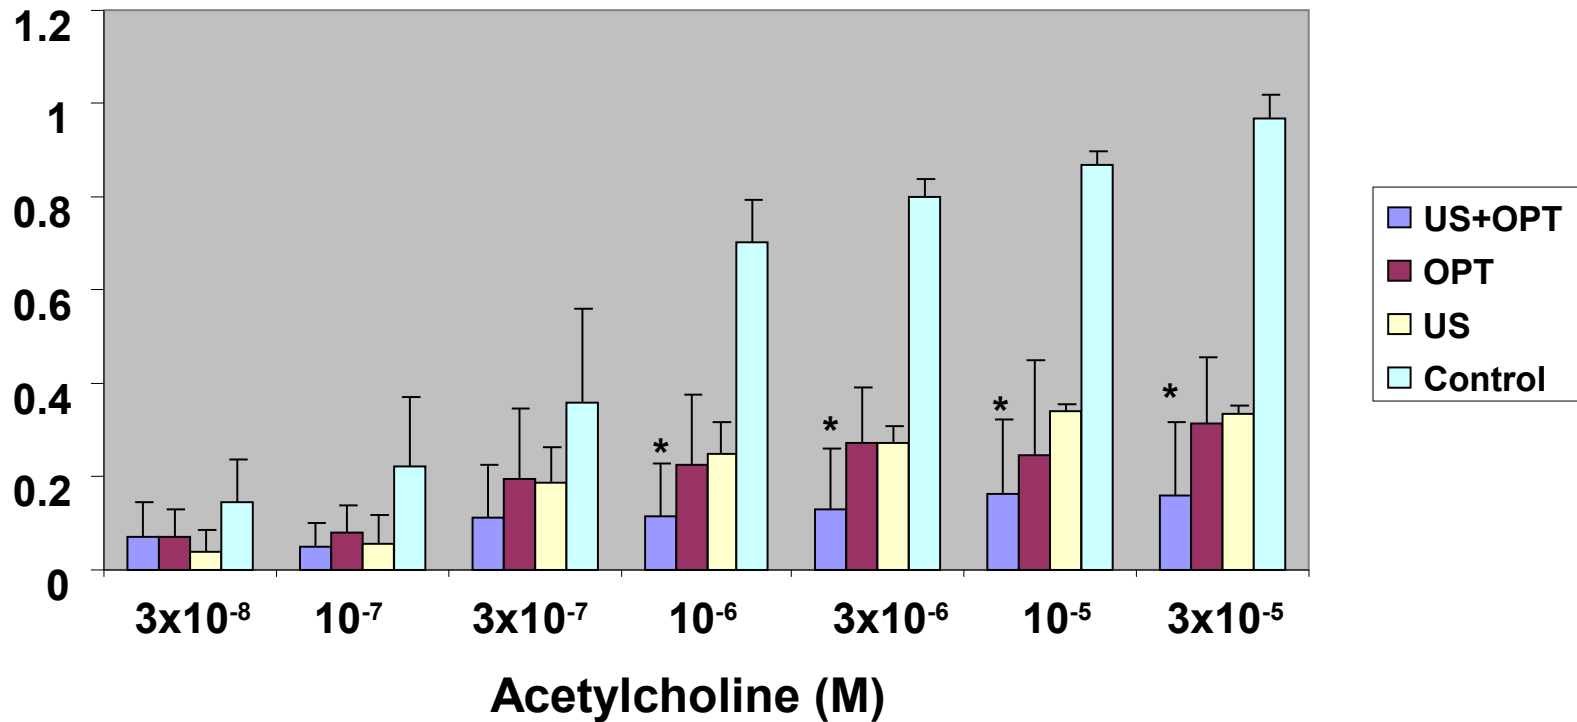

Supplement: MOESM5 [file 9555734]
